# Supplementary material
Source: PubMed Central journal article supplement (PMC153575)

**Ht31 (1239-1273)**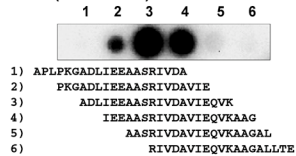**AKAPKL (577-609)**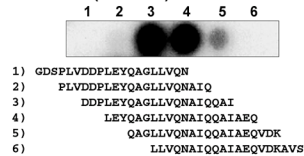**AKAP18 (19-53)**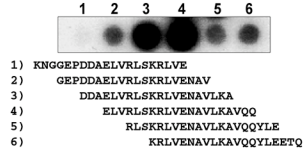**AKAP220 (784-818)**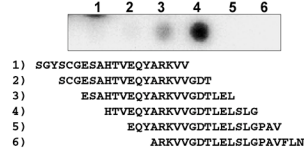**AKAP79 (379-413)**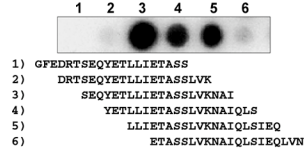**Gravin (1495-1529)**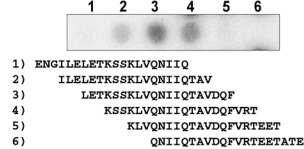**mAKAP (2044-2078)**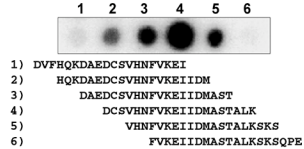**AKAP110 (133-167)**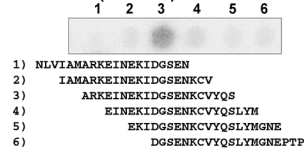**Yotiao (1444-1478)**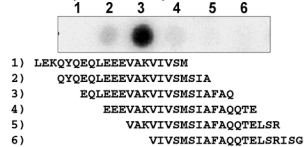**Rab32 (169-203)**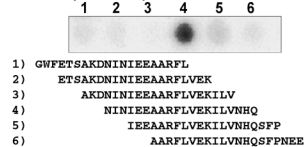

Supplement: pnas_0330734100_2.pdf [file pnas_0330734100_2.pdf]
